# Supplementary material
Source: HighWire-hosted journal article supplement (https://cmaj.ca/highwire/filestream/59596/field_highwire_adjunct_files/10/150771-res-Appendix_9.pdf)
Supplement: 150771-res-Appendix_9.pdf [file 150771-res-Appendix_9.pdf]

**Appendix 9 (as supplied by the authors): Incidence and Risk of All-Cause Death, Major Adverse Cardiac Events, and Hospitalization for Acute Kidney Injury and Hyperkalemia Among Patients Using ARBs and ACEIs before Propensity Score Matching.**

|                                         | ARB cohort   |              |                 | ACEI cohort (As Reference) |              |                 | Crude                 | Adjusted <sup>†</sup> | Competing Risk <sup>‡</sup> |
|-----------------------------------------|--------------|--------------|-----------------|----------------------------|--------------|-----------------|-----------------------|-----------------------|-----------------------------|
|                                         | No. of Event | Person-years | Incidence rate* | No. of Event               | Person-years | Incidence rate* | Hazard Ratio (95% CI) | Hazard Ratio (95% CI) | Hazard Ratio (95% CI)       |
| <b>Intention-to-Treat Analysis</b>      |              |              |                 |                            |              |                 |                       |                       |                             |
| All-cause death                         | 2,079        | 81,121       | 25.63           | 1,968                      | 68,605       | 28.69           | 0.96 (0.90-1.02)      | 0.94 (0.88-1.00)      | -                           |
| Major adverse cardiac events            | 1,349        | 77,827       | 17.33           | 1,237                      | 64,943       | 19.05           | 0.92 (0.85-1.00)      | 0.94 (0.87-1.02)      | 0.95 (0.87-1.02)            |
| Myocardial infarction                   | 448          | 80,166       | 5.59            | 389                        | 67,719       | 5.74            | 1.01 (0.88-1.16)      | 1.01 (0.87-1.16)      | 1.01 (0.88-1.17)            |
| Ischemic Stroke                         | 978          | 78,671       | 12.43           | 907                        | 65,723       | 13.80           | 0.91 (0.83-0.99)      | 0.94 (0.85-1.03)      | 0.94 (0.86-1.03)            |
| Cardiovascular death                    | 645          | 81,069       | 7.96            | 529                        | 68,577       | 7.71            | 1.15 (1.03-1.29)      | 1.02 (0.91-1.16)      | -                           |
| Hospitalization for acute kidney injury | 1,041        | 79,289       | 13.13           | 819                        | 66,925       | 12.24           | 1.09 (1.00-1.20)      | 1.01 (0.92-1.11)      | 1.02 (0.92-1.12)            |
| Hospitalization for hyperkalemia        | 488          | 80,096       | 6.09            | 397                        | 67,555       | 5.88            | 1.06 (0.93-1.21)      | 1.00 (0.87-1.15)      | 1.01 (0.88-1.16)            |
| <b>As-Treated Analysis</b>              |              |              |                 |                            |              |                 |                       |                       |                             |
| All-cause death                         | 440          | 52,234       | 8.42            | 210                        | 26,896       | 7.81            | 1.10 (0.93-1.29)      | 1.00 (0.84-1.18)      | -                           |
| Major adverse cardiac events            | 697          | 51,271       | 13.59           | 416                        | 26,459       | 15.72           | 0.87 (0.77-0.98)      | 0.92 (0.81-1.04)      | 0.94 (0.87-1.02)            |
| Myocardial infarction                   | 212          | 51,987       | 4.08            | 104                        | 26,818       | 3.88            | 1.05 (0.83-1.33)      | 1.09 (0.85-1.40)      | 1.01 (0.87-1.17)            |
| Ischemic Stroke                         | 509          | 51,497       | 9.88            | 322                        | 26,535       | 12.13           | 0.82 (0.71-0.94)      | 0.86 (0.75-1.00)      | 0.94 (0.85-1.03)            |
| Cardiovascular death                    | 70           | 52,229       | 1.34            | 23                         | 26,896       | 0.86            | 1.58 (0.98-2.53)      | 1.45 (0.89-2.36)      | -                           |
| Hospitalization for acute kidney injury | 477          | 51,769       | 9.21            | 180                        | 26,752       | 6.73            | 1.38 (1.16-1.64)      | 1.18 (0.98-1.41)      | 1.01 (0.91-1.11)            |
| Hospitalization for hyperkalemia        | 213          | 51,961       | 4.10            | 92                         | 26,783       | 3.44            | 1.21 (0.95-1.55)      | 1.07 (0.83-1.39)      | 1.03 (0.90-1.18)            |

\* per 10<sup>3</sup> person-years.

<sup>†</sup> Adjusted for propensity score.

<sup>‡</sup>Death as a competing risk in this model.

Abbreviations: CI, confidence interval; ARBs, Angiotensin II receptor blockers; ACEIs, angiotensin-converting-enzyme inhibitors.
